# Supplementary material
Source: Springer Nature journal article supplement (https://www.springermedizin.de/resource/supplementary/13023_2013_716_MOESM1_ESM.pdf/9642904)
Supplement: MOESM1 [file 9642904]

## Additional file 1

### PCR primers:

| Exon | Forward primer (5' – 3') | Reverse primer (5' – 3') | Amplicon length |
|------|--------------------------|--------------------------|-----------------|
| 2    | acgcagccccagctttac       | aagccagcgcatattctcc      | 395             |
| 3    | gtgcaggacataacagcttc     | gagcagaggctggaggtg       | 528             |
| 4    | ccgtctctagccacctcatc     | gaccgagttgaaggcgaat      | 338             |
| 4    | agaccttccattcgccttc      | agtcaaatgaccccagtc       | 483             |

### PCR conditions:

- 100 ng DNA
- 1× PCRx Amplification Buffer (Invitrogen, Carlsbad, CA)
- 2× PCRx Enhancer Solution (Invitrogen)
- 0.2 mmol/l of each dNTP (Invitrogen)
- 1.5 mmol/l MgSO<sub>4</sub> (Invitrogen)
- 1 unit PlatinumTaq DNA polymerase (Invitrogen)
- 0,50 μmol/l of each oligodeoxynucleotide primer (IDT, Coralville, IA)

Total volume: 15 μl

### Cycling conditions:

| PCR step                                                              | Temperature | Time   |
|-----------------------------------------------------------------------|-------------|--------|
| Initial denaturation                                                  | 94 °C       | 5 min  |
| 10 touchdown cycles (annealing temperature decreases 1 °C each cycle) | 94 °C       | 30 sec |
|                                                                       | 65 °C       | 15 sec |
|                                                                       | 72 °C       | 60 sec |
| 35 amplification cycles                                               | 94 °C       | 45 sec |
|                                                                       | 55 °C       | 45 sec |
|                                                                       | 72 °C       | 90 sec |
| Final extension                                                       | 72 °C       | 10 min |
